# Supplementary material for: Convergent charge interval spacing of zwitterionic 4-vinylpyridine carboxybetaine structures for superior blood-inert regulation in amphiphilic phases
Source: Royal Society of Chemistry journal article supplement (doi:10.1039/d1tb01374b), 2021-01-01
Supplement: d1tb01374b1.pdf [file d1tb01374b1.pdf]

## Supporting Information

# Convergent charge interval spacing of zwitterionic 4-vinylpyridine carboxybetaine structures for superior blood-inert regulation in amphiphilic phases

Chien-Yang Chiu<sup>†a</sup>, Yung Chang<sup>\*b</sup>, Tzu-Hao Liu<sup>†a</sup>, Ying-Nien Chou<sup>†b</sup>, and Ta-Jen Yen<sup>\*a</sup>

a. Department of Materials Science and Engineering, National Tsing Hua University, Hsinchu  
30013, Taiwan,

b. R&D Center for Membrane Technology and Department of Chemical Engineering, Chung  
Yuan Christian University, Chung-Li, Taoyuan 320, Taiwan.

<sup>†</sup> These authors contributed equally.

<sup>\*</sup> Corresponding authors

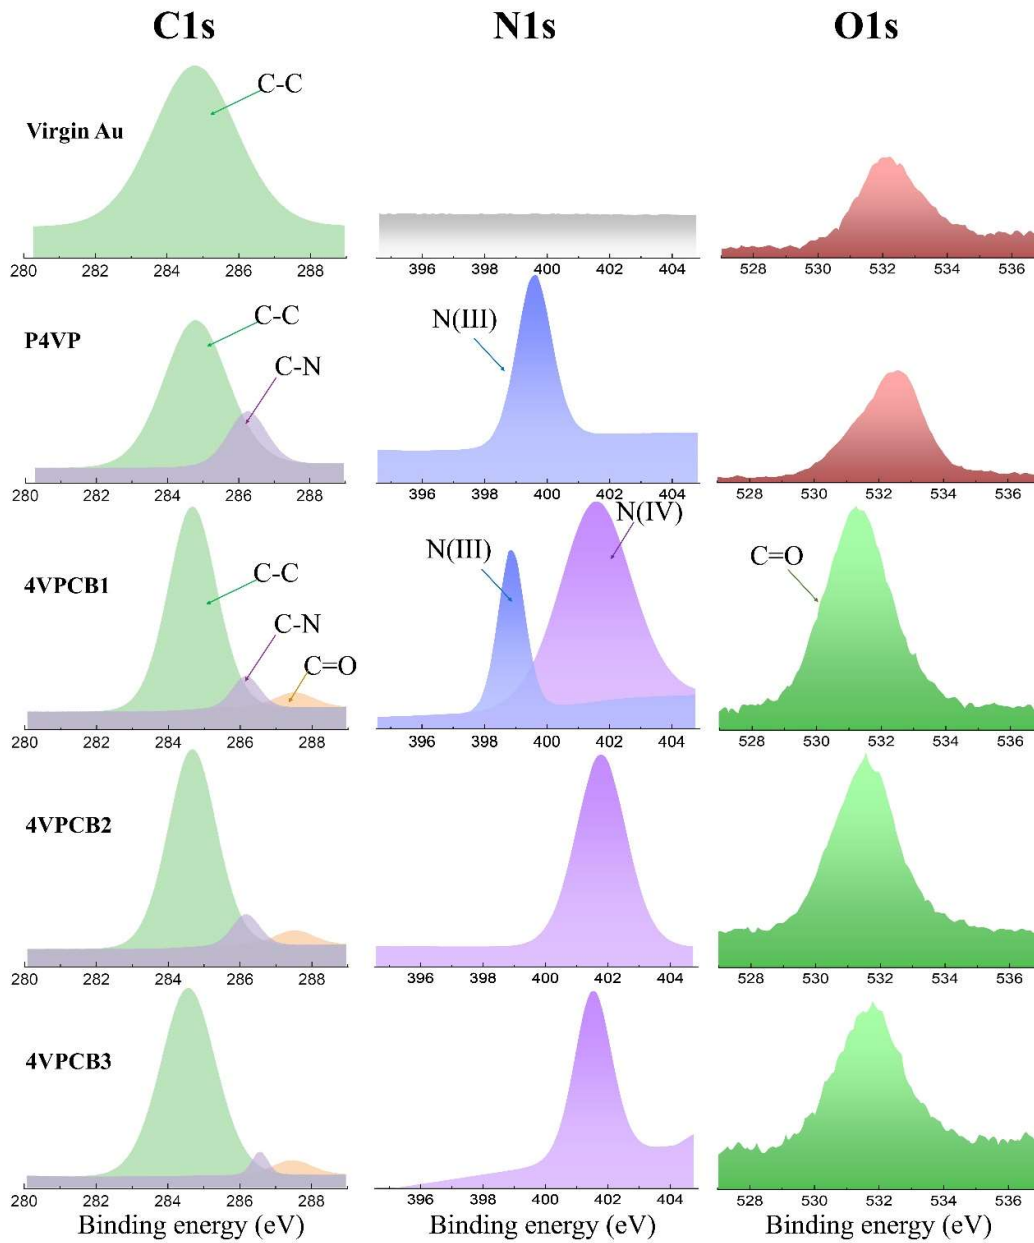

**Figure S1.** XPS spectra of the gold surface modified with P4VPCB1, P4VPCB2, P4VPCB3 in the N1s, O1s and C1s regions.

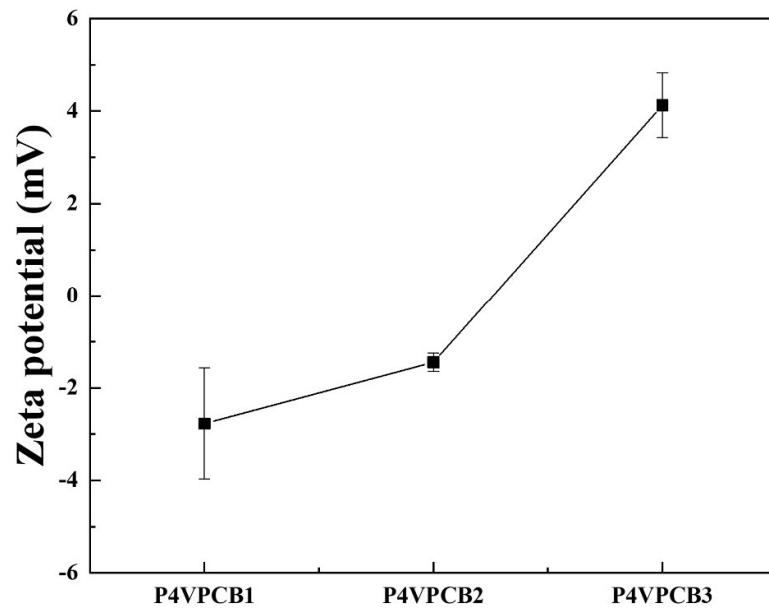

**Figure S2.** The zeta potential of P4VPCB1, P4VPCB2 and P4VPCB3 polymers in PBS solution. The results are presented as mean  $\pm$  SD.

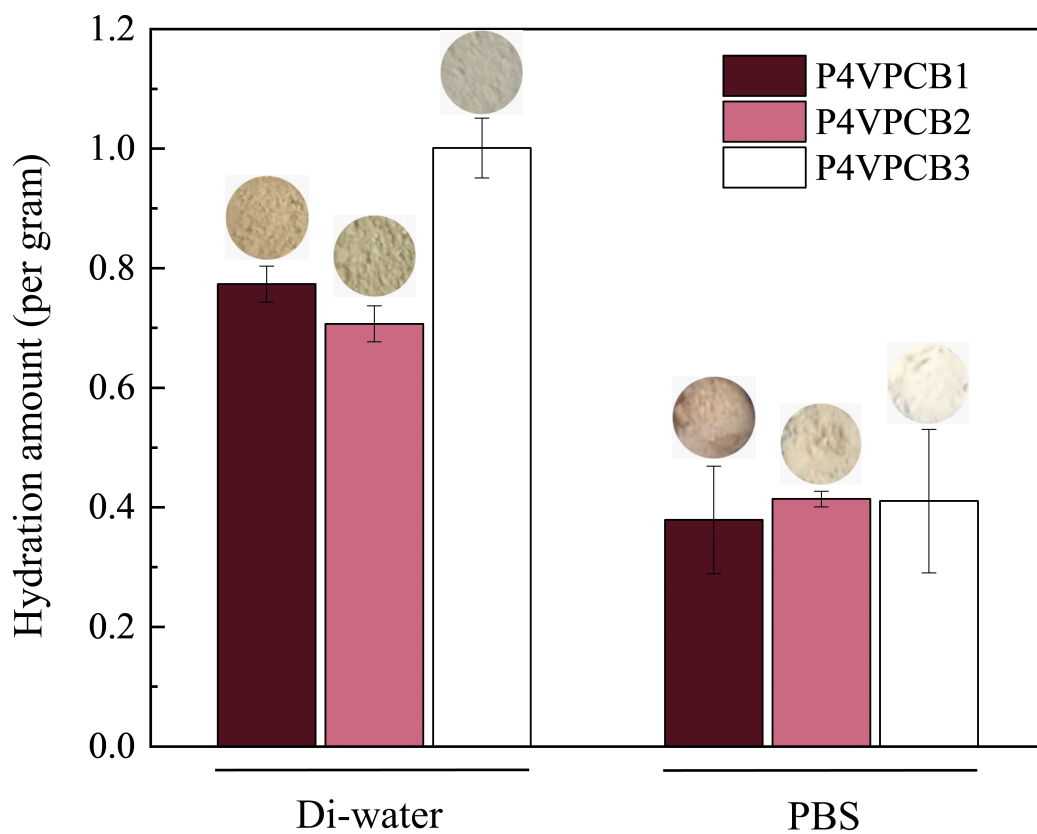

**Figure S3.** Showing the image, weight of the powder and hydration amount in water and PBS from the polymer powder, the photographs show (from left to right) P4VPCB1, P4VPCB2 and P4VPCB3 powder.

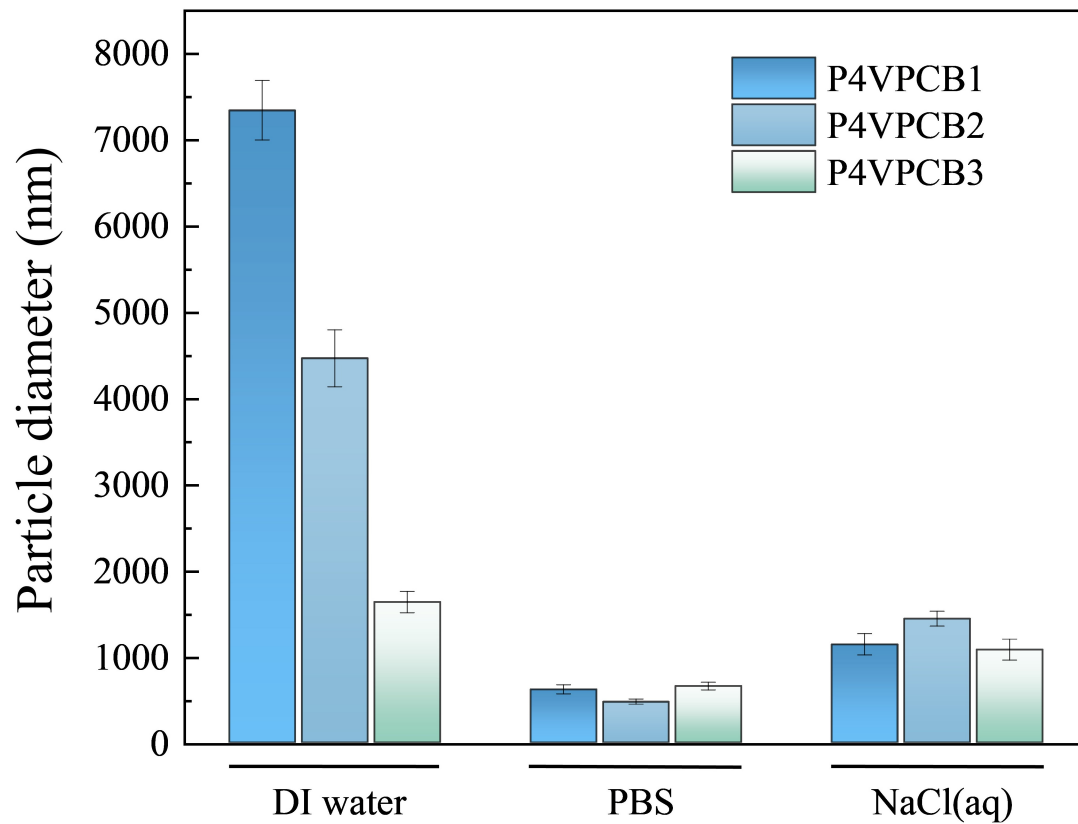

**Figure S4.** Particle diameters measured by dynamic light scattering with P4VPCB1, P4VPCB2 and P4VPCB3 in different ionic strength solvent (low to high).

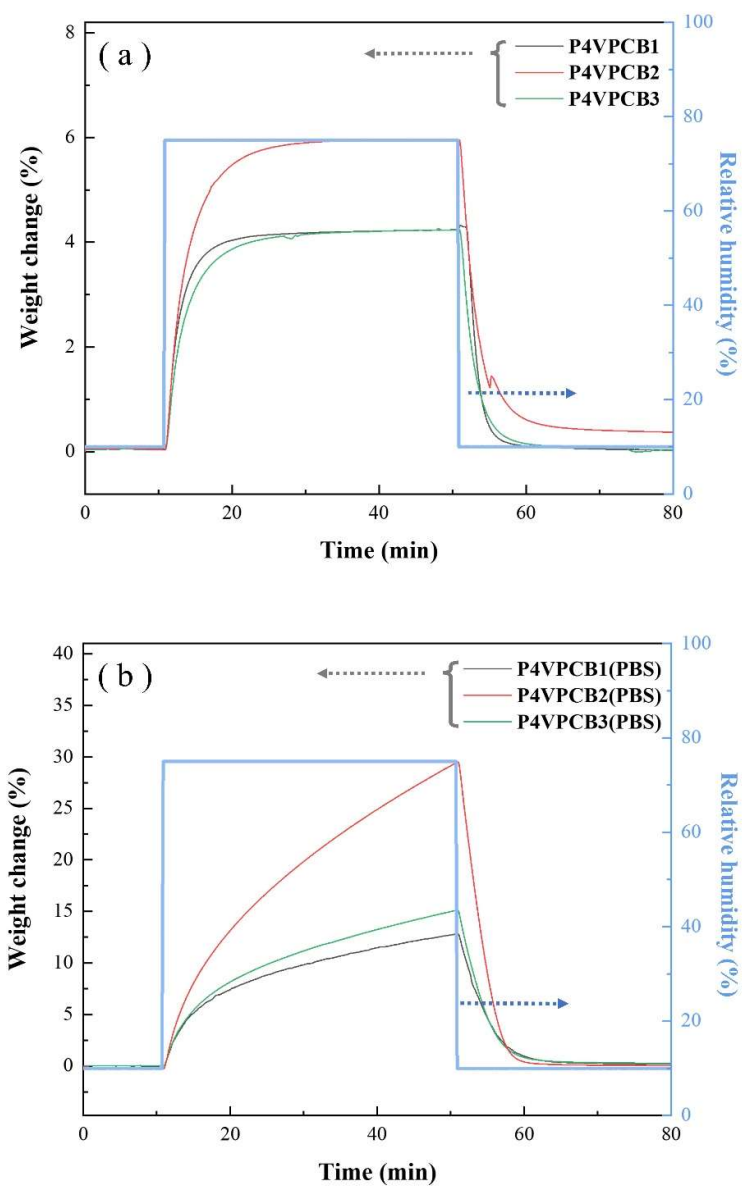

**Figure S5.** Real-time measurement of the dynamic water vapor adsorption isotherms of P4VPCB1, P4VPCB2, P4VPCB3 and the weight percentage (%) change of relative humidity (increased from 10% to 75% at 37°C). (a) P4VPCB polymer powder was dissolved and lyophilized in DI water for analysis; (b) P4VPCB polymer powder was dissolved and lyophilized in PBS for analysis.

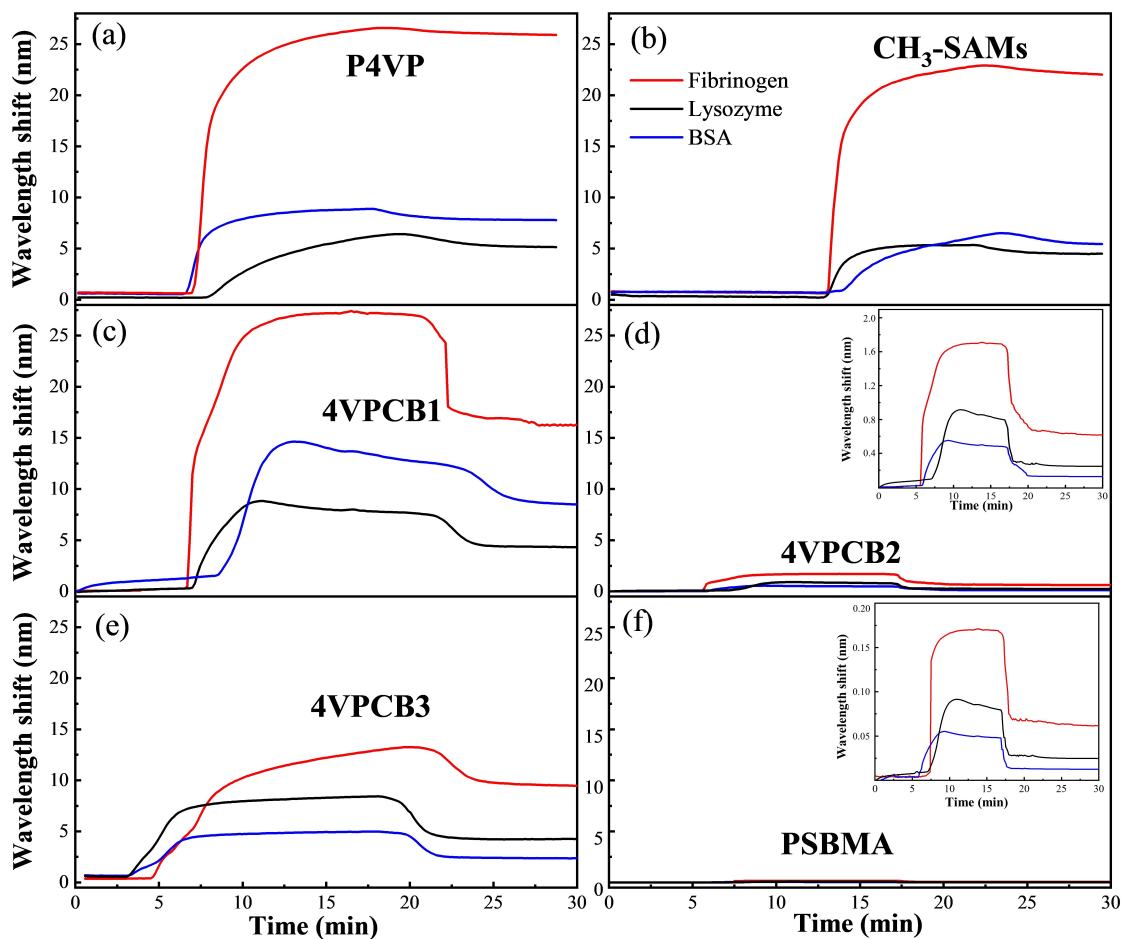

**Figure S6.** SPR sensorgrams of Fibrinogen, Lysozyme, and BSA protein adsorption with different polymer brushes of (a) P4VP, (b) CH<sub>3</sub>-SAMs, (c) P4VPCB1, (d) P4VPCB2, (e) P4VPCB3, and (f) PSBMA grafted on gold chips.

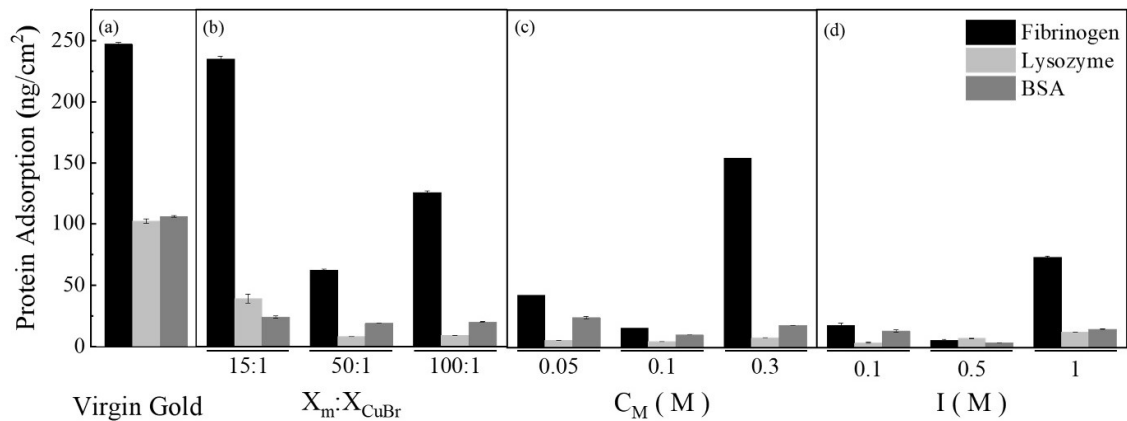

**Figure S7.** The protein adsorption of Fibrinogen, Lysozyme and BSA on (a) virgin gold surface and P4VPCB2 surfaces under different polymerization conditions, including different (b) monomer to catalyst (CuBr) ratios,  $X_m:X_{CuBr}$ ; (c) monomer concentrations,  $C_M$ ; (d) ionic strengths,  $I(M)$ , adjusted by NaCl in the reaction solution.



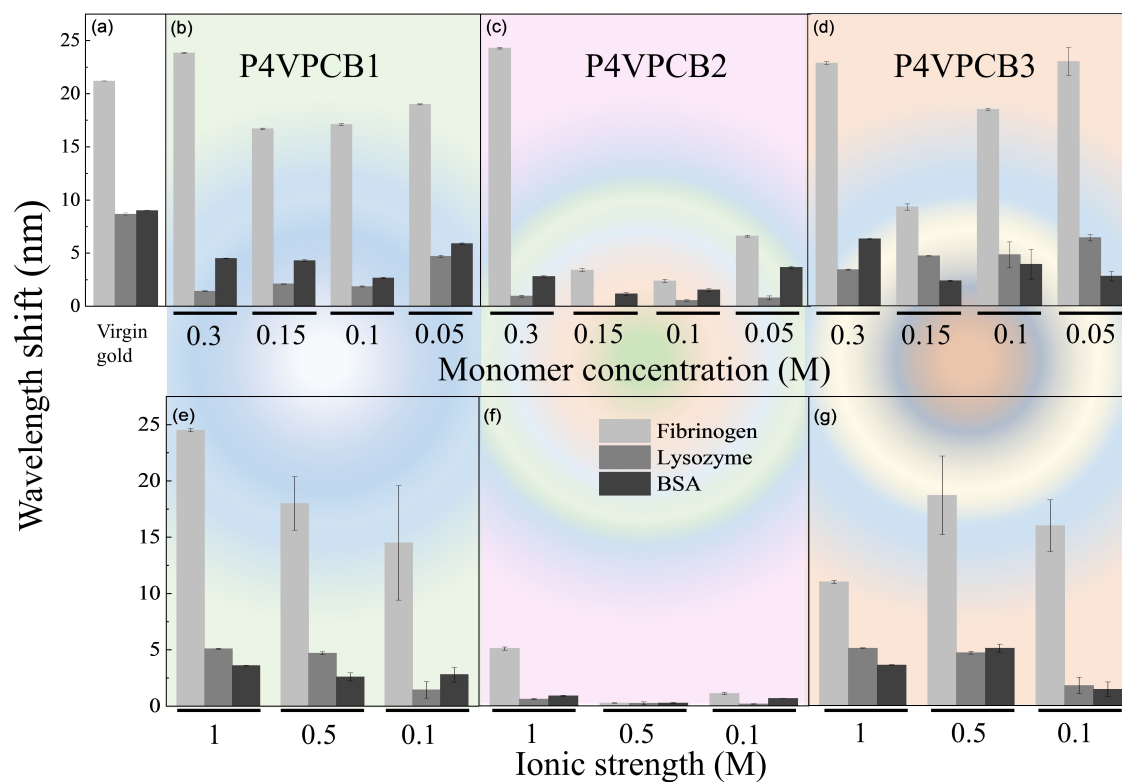

**Figure S8.** Protein adsorption of Fibrinogen, Lysozyme, and BSA on (a) virgin gold surface; (b) P4VPCB1, (c) P4VPCB2, and (d) P4VPCB3 surfaces with a controlled monomer concentration in the reaction solution; (e) P4VPCB1, (f) P4VPCB2, and (g) P4VPCB3 surfaces with controlled ionic strengths adjusted by NaCl in the reaction solution, respectively.
